# Supplementary material for: Multifractality of Climate Networks
Source: Copernicus journal article supplement (doi:10.5194/egusphere-2024-2793), 2024-09-27
Supplement: Supplementary file 1 [file egusphere-2024-2793-supplement.pdf]

# Supplementary Material for "Multifractality of Climate Networks"

Adarsh Jojo Thomas<sup>1</sup>, Jürgen Kurths<sup>2</sup>, and Daniel Schertzer<sup>1</sup>

<sup>1</sup>Hydrology Meteorology & Complexity (HM&Co), École nationale des ponts et chaussées, IP Paris, 6-8 Av. Blaise Pascal, Champs-sur-Marne, France

<sup>2</sup>Department of Complexity Science, Potsdam Institute for Climate Impact Research, Telegrafenberg A31, 14473 Potsdam, Germany

**Correspondence:** Adarsh Jojo Thomas (adarsh-jojo.thomas@enpc.fr)

## 1 TDMI Properties

The TDMI measure has the following interesting properties:

- Symmetry:  $I(R_\lambda(\mathbf{x}, t), R_\lambda(\mathbf{y}, t + \tau)) = I(R_\lambda(\mathbf{y}, t), R_\lambda(\mathbf{x}, t - \tau))$
- It measures the shared or redundant information between two time series, and is a generalization of the cross-correlation which can be used to estimate the time delay between processes (Mars and van Arragon, 1982).
- Non-negativeness  $I(R_\lambda(\mathbf{x}, t), R_\lambda(\mathbf{y}, t + \tau)) \geq 0$ , with equality when both time series have no dependence.
- $I(R_\lambda(\mathbf{x}, t), R_\lambda(\mathbf{x}, t + \tau))$  is similar to the auto-correlation function, and equals to the entropy of the system at  $\tau = 0$ .

The rain rate time series is rank transformed and normalized to the unit interval as a data pre-processing step, since mutual information is invariant under it and this can reduce statistical errors in its estimation (Kraskov et al., 2004). Marginal and joint probability densities are computed using histograms with equiquantal binning (Kraskov et al., 2004; Haas et al., 2023; Cellucci et al., 2005).

## References

- Cellucci, C. J., Albano, A. M., and Rapp, P. E.: Statistical validation of mutual information calculations: Comparison of alternative numerical algorithms, *Phys. Rev. E*, 71, 066 208, <https://doi.org/10.1103/PhysRevE.71.066208>, publisher: American Physical Society, 2005.
- 15 Haas, M., Goswami, B., and Luxburg, U. v.: Pitfalls of Climate Network Construction—A Statistical Perspective, *Journal of Climate*, 36, 3321–3342, <https://doi.org/10.1175/JCLI-D-22-0549.1>, publisher: American Meteorological Society Section: Journal of Climate, 2023.
- Kraskov, A., Stögbauer, H., and Grassberger, P.: Estimating mutual information, *Phys. Rev. E*, 69, 066 138, <https://doi.org/10.1103/PhysRevE.69.066138>, publisher: American Physical Society, 2004.
- Mars, N. J. I. and van Arragon, G. W.: Time delay estimation in non-linear systems using average amount of mutual information analysis, 20 *Signal Processing*, 4, 139–153, [https://doi.org/10.1016/0165-1684\(82\)90017-2](https://doi.org/10.1016/0165-1684(82)90017-2), 1982.
